# Supplementary material for: Selective recovery of zinc from goethite residue in the zinc industry using deep-eutectic solvents
Source: Royal Society of Chemistry journal article supplement (doi:10.1039/d0ra00277a), 2020-01-01
Supplement: d0ra00277a1.pdf [file d0ra00277a1.pdf]

*Electronic Supplementary Information (ESI)*

# Selective recovery of zinc from goethite residue of the zinc industry using deep-eutectic solvents

Nerea Rodriguez Rodriguez,<sup>a,b,\*</sup> Lieven Machiels,<sup>a</sup> Bieke Onghena,<sup>b</sup> Jeroen Spooren,<sup>c</sup>  
Koen Binnemans<sup>a</sup>

<sup>a</sup>KU Leuven, Department of Chemistry, Celestijnenlaan 200F, P.O. box 2404, B-3001 Leuven, Belgium.

<sup>b</sup>SIM vzw, Technologiepark 935,B-9052 Zwijnaarde, Belgium.

<sup>c</sup>Waste Recycling Technologies, Sustainable Materials Management, Flemish Institute for Technological Research, VITO N.V., Boeretang 200, 2400 Mol, Belgium

\*Corresponding author:

Email: [nerea.rodriguezrodriguez@kuleuven.be](mailto:nerea.rodriguezrodriguez@kuleuven.be)

Number of pages: 8

Number of figures: 5

Number of tables: 4

# 1 Characterization

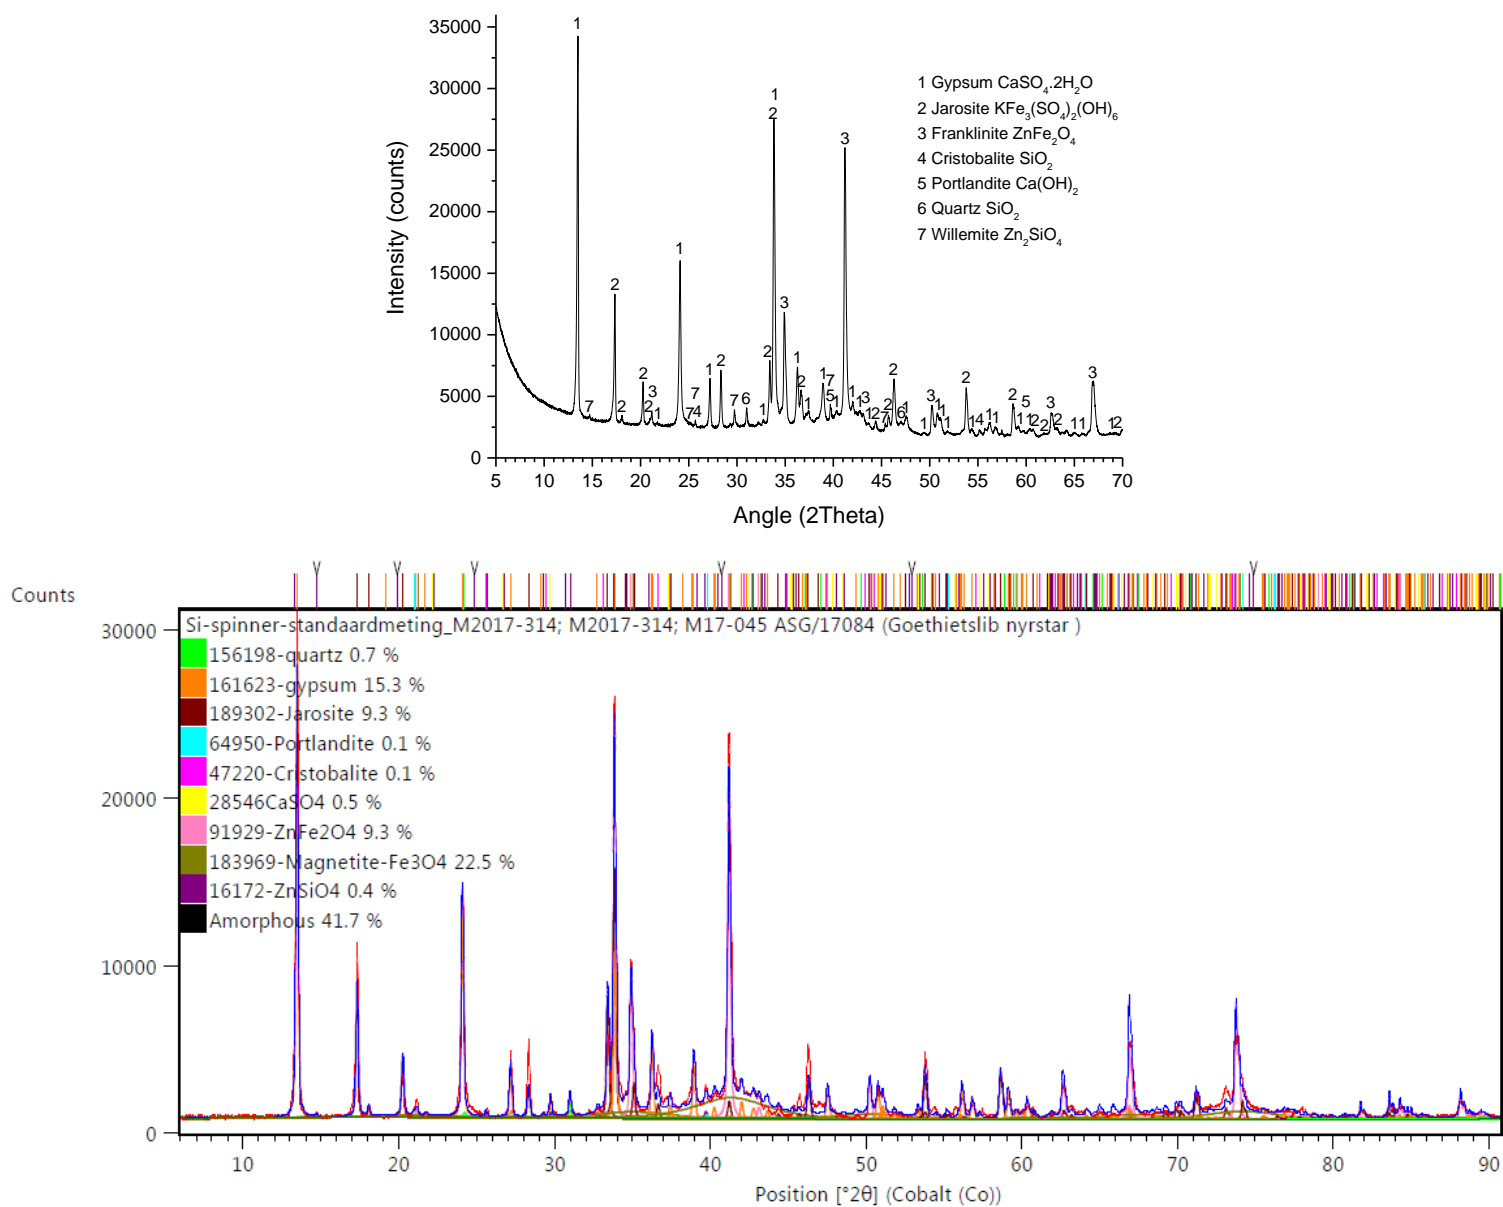

Figure S1: X-ray diffractogram of goethite: (top) assignment of phases to the peaks; (bottom) quantification (Rietveld) of phases

EPMA analysis has been used to investigate the distribution of the metals in the mineral phases. The elemental mappings of different particles show that the zinc is often combined with iron in different types of mineral phases (Figure S2), or surrounded by an iron oxide layer (Figure S3-S4). This type of distribution of suggests that the selective recovery of the zinc is complicated. Nonetheless, easily accessible zinc can be found in some small particles (Figure S5).

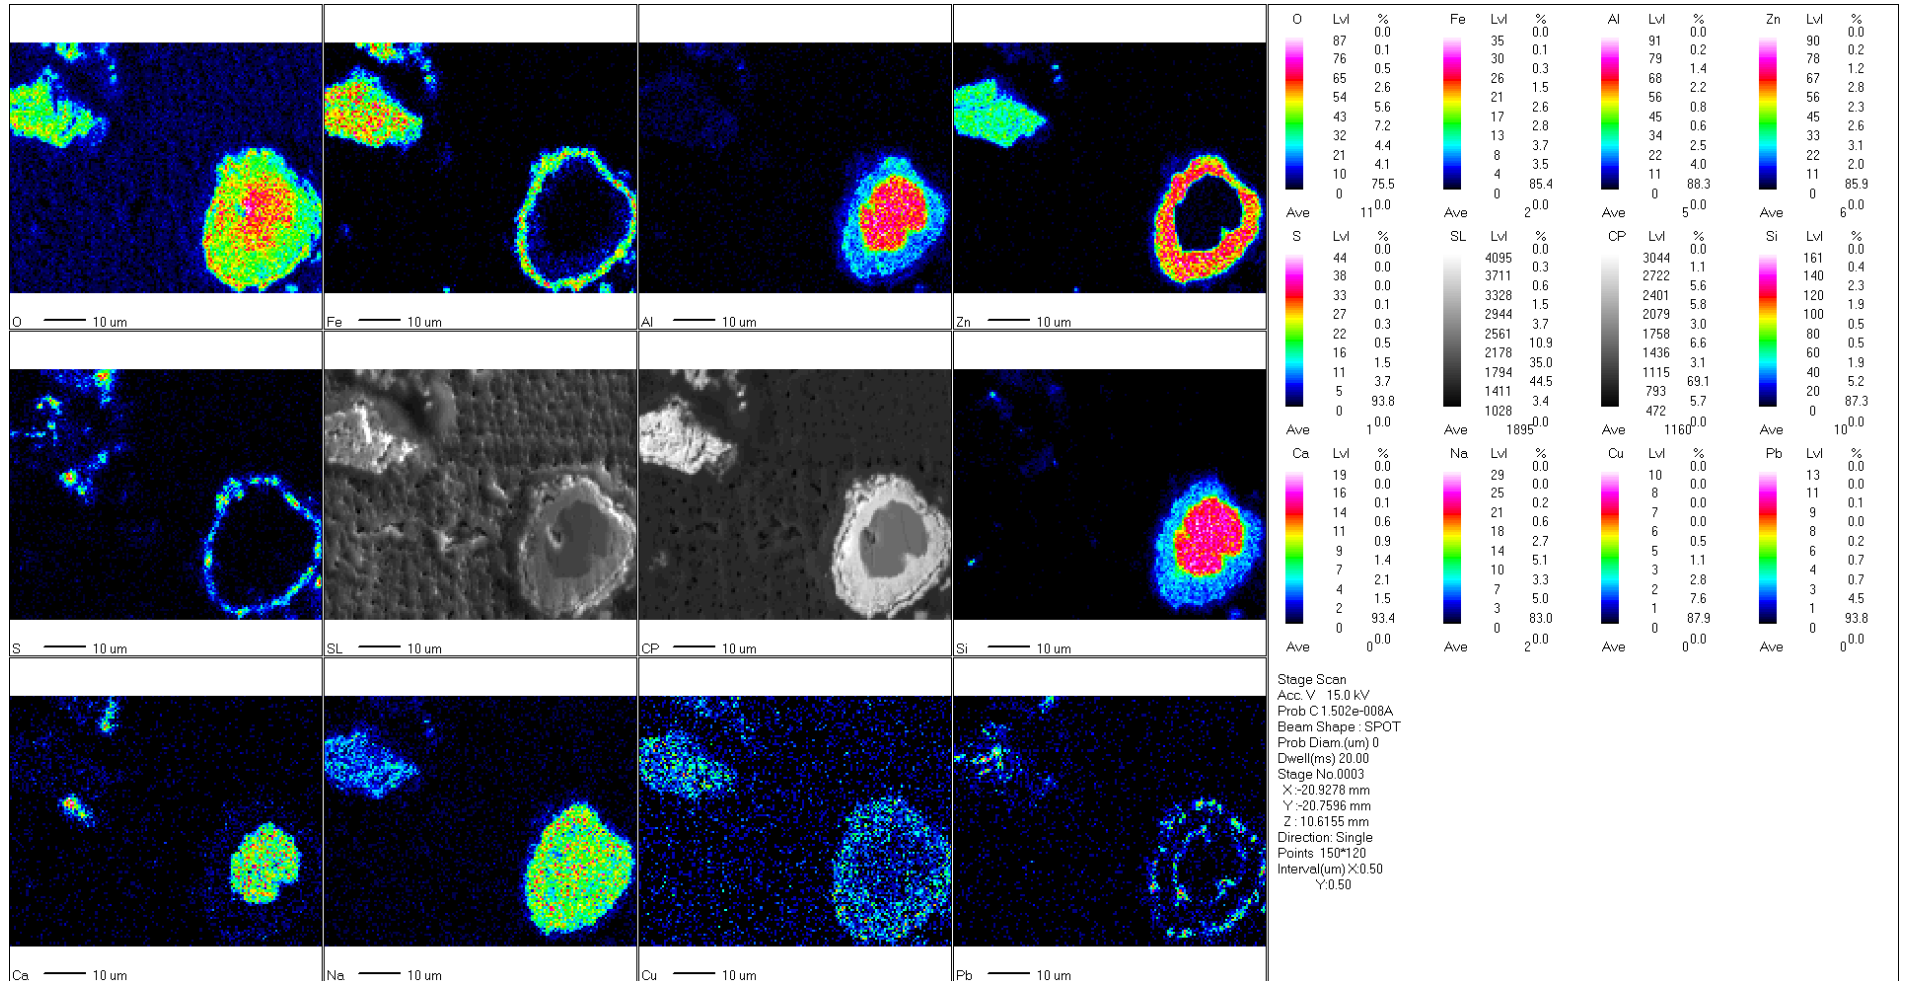

Figure S2: EPMA mapping of the goethite residue

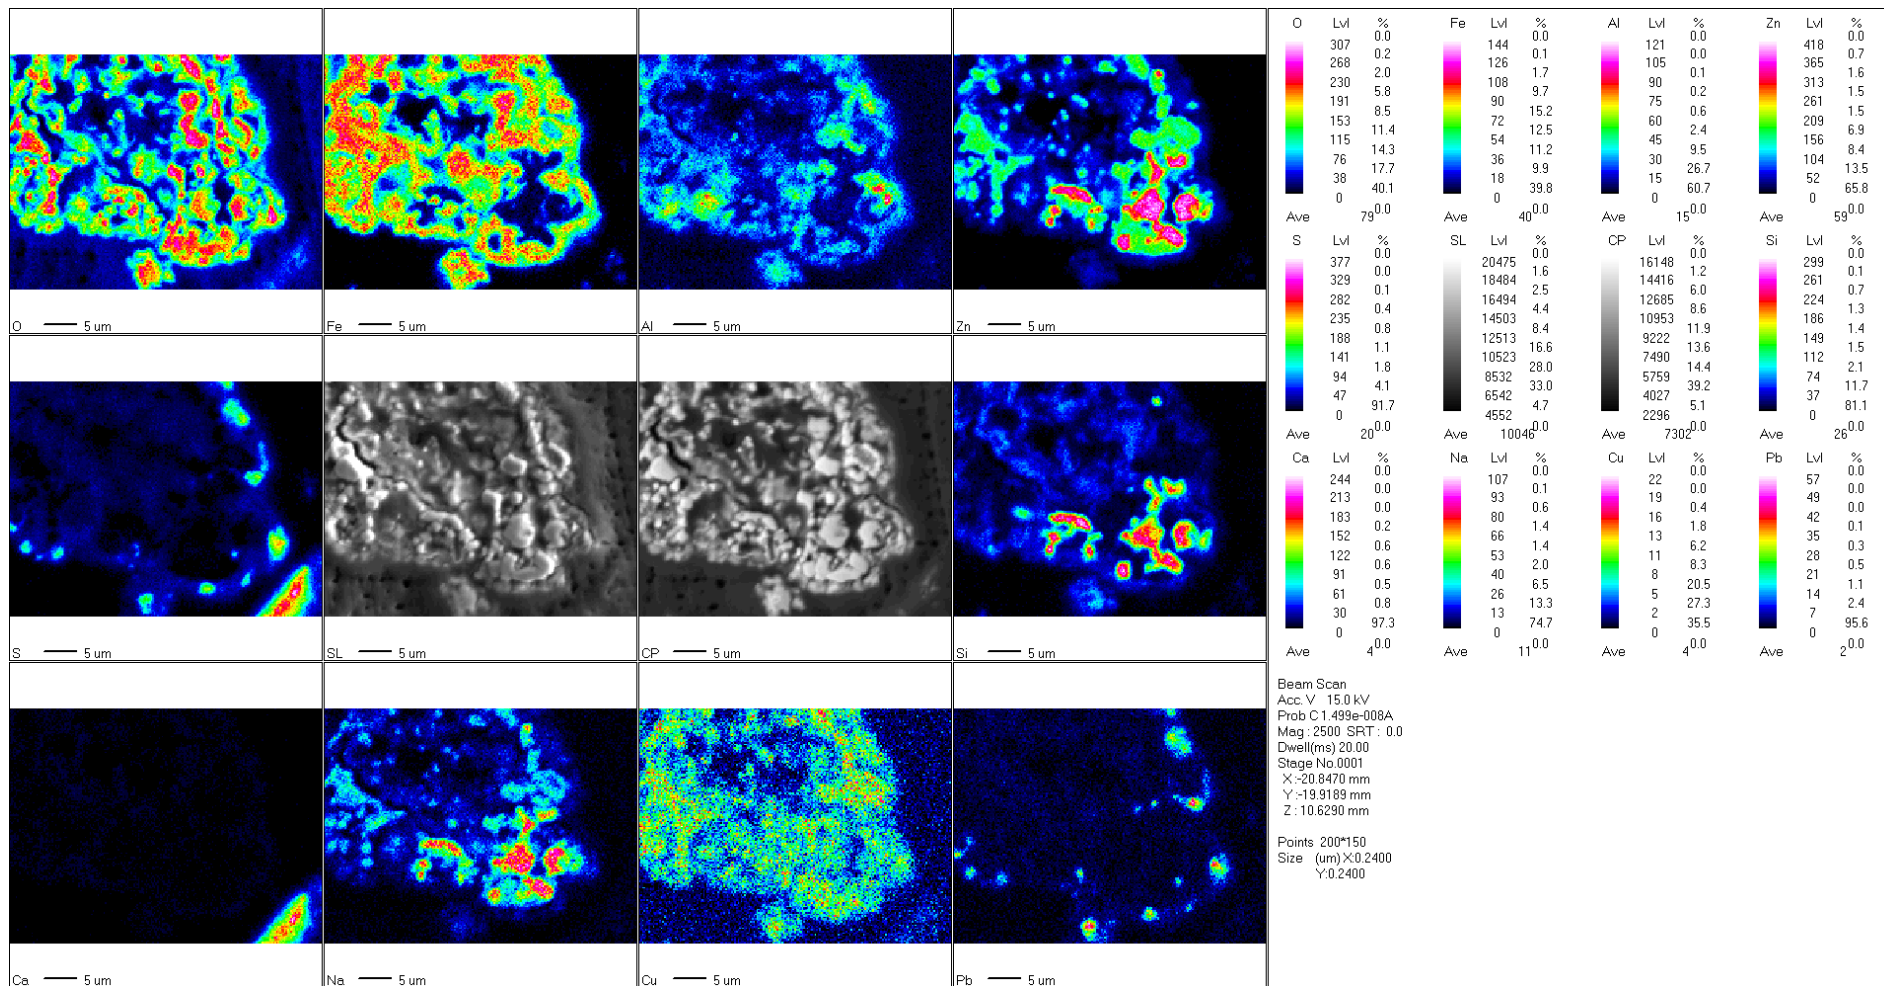

Figure S3: EPMA mapping of the goethite residue

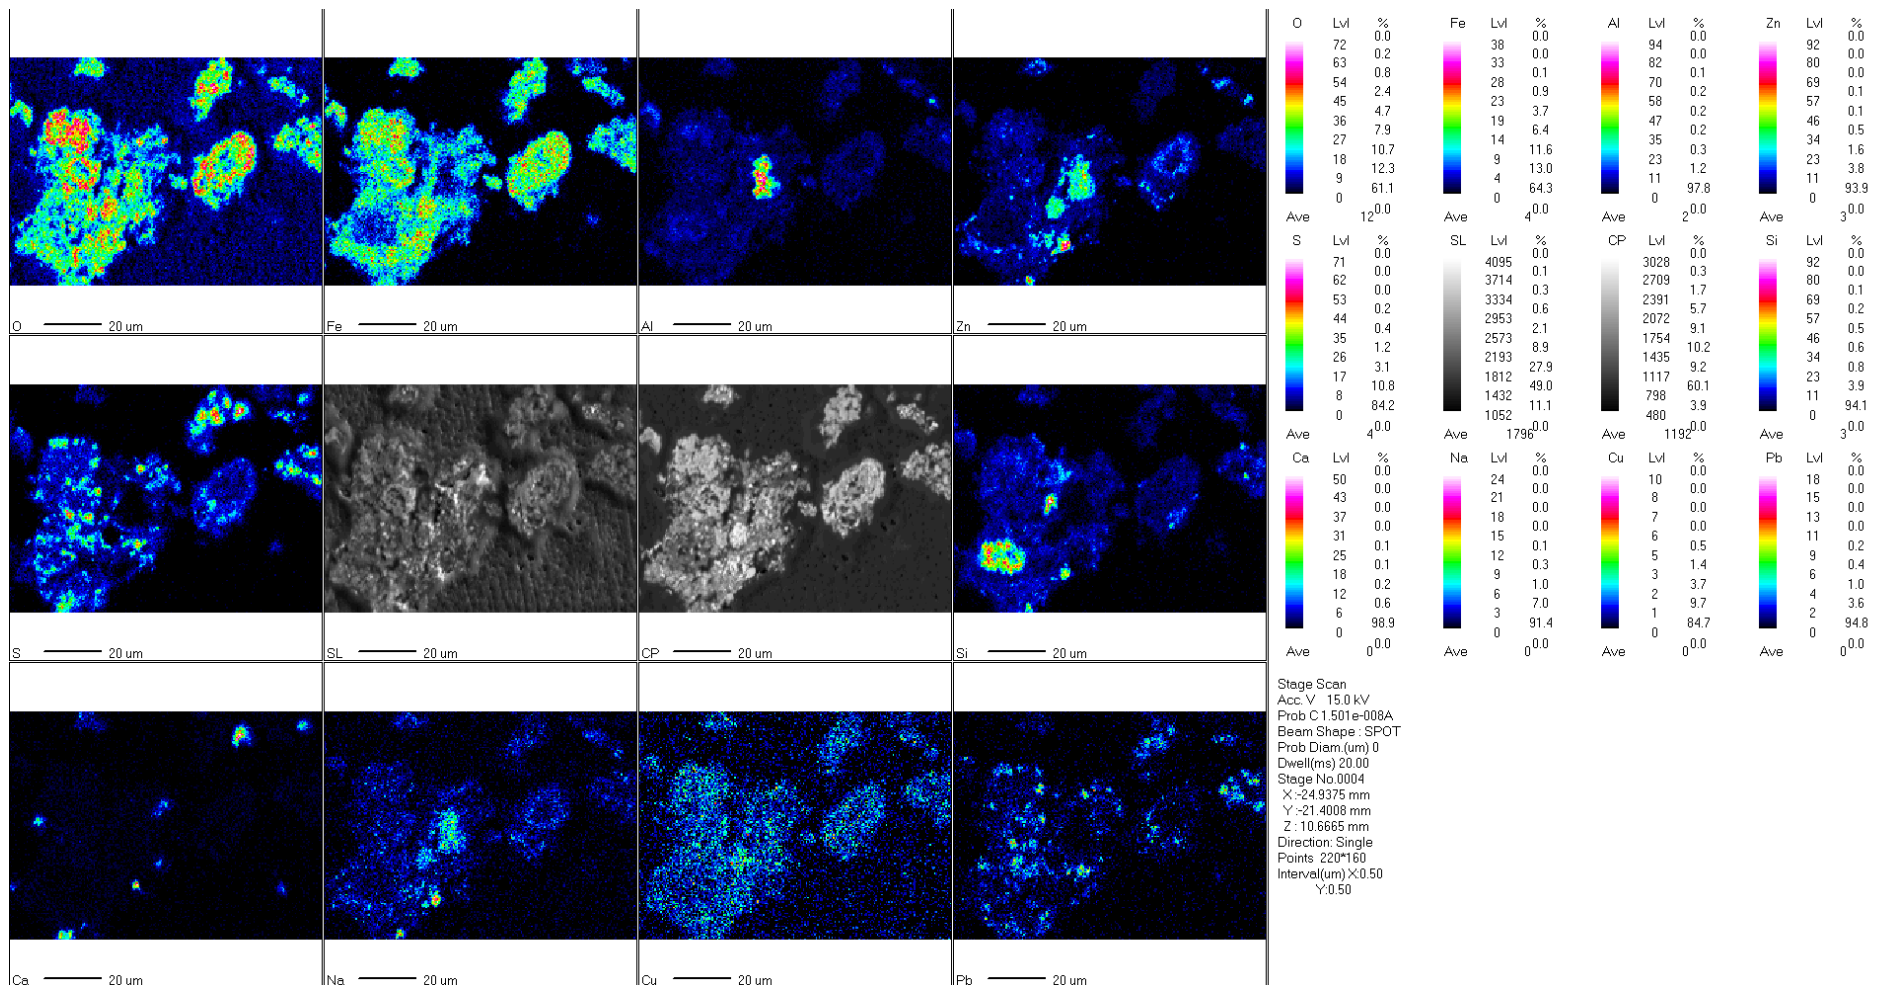

Figure S4: EPMA mapping of the goethite residue

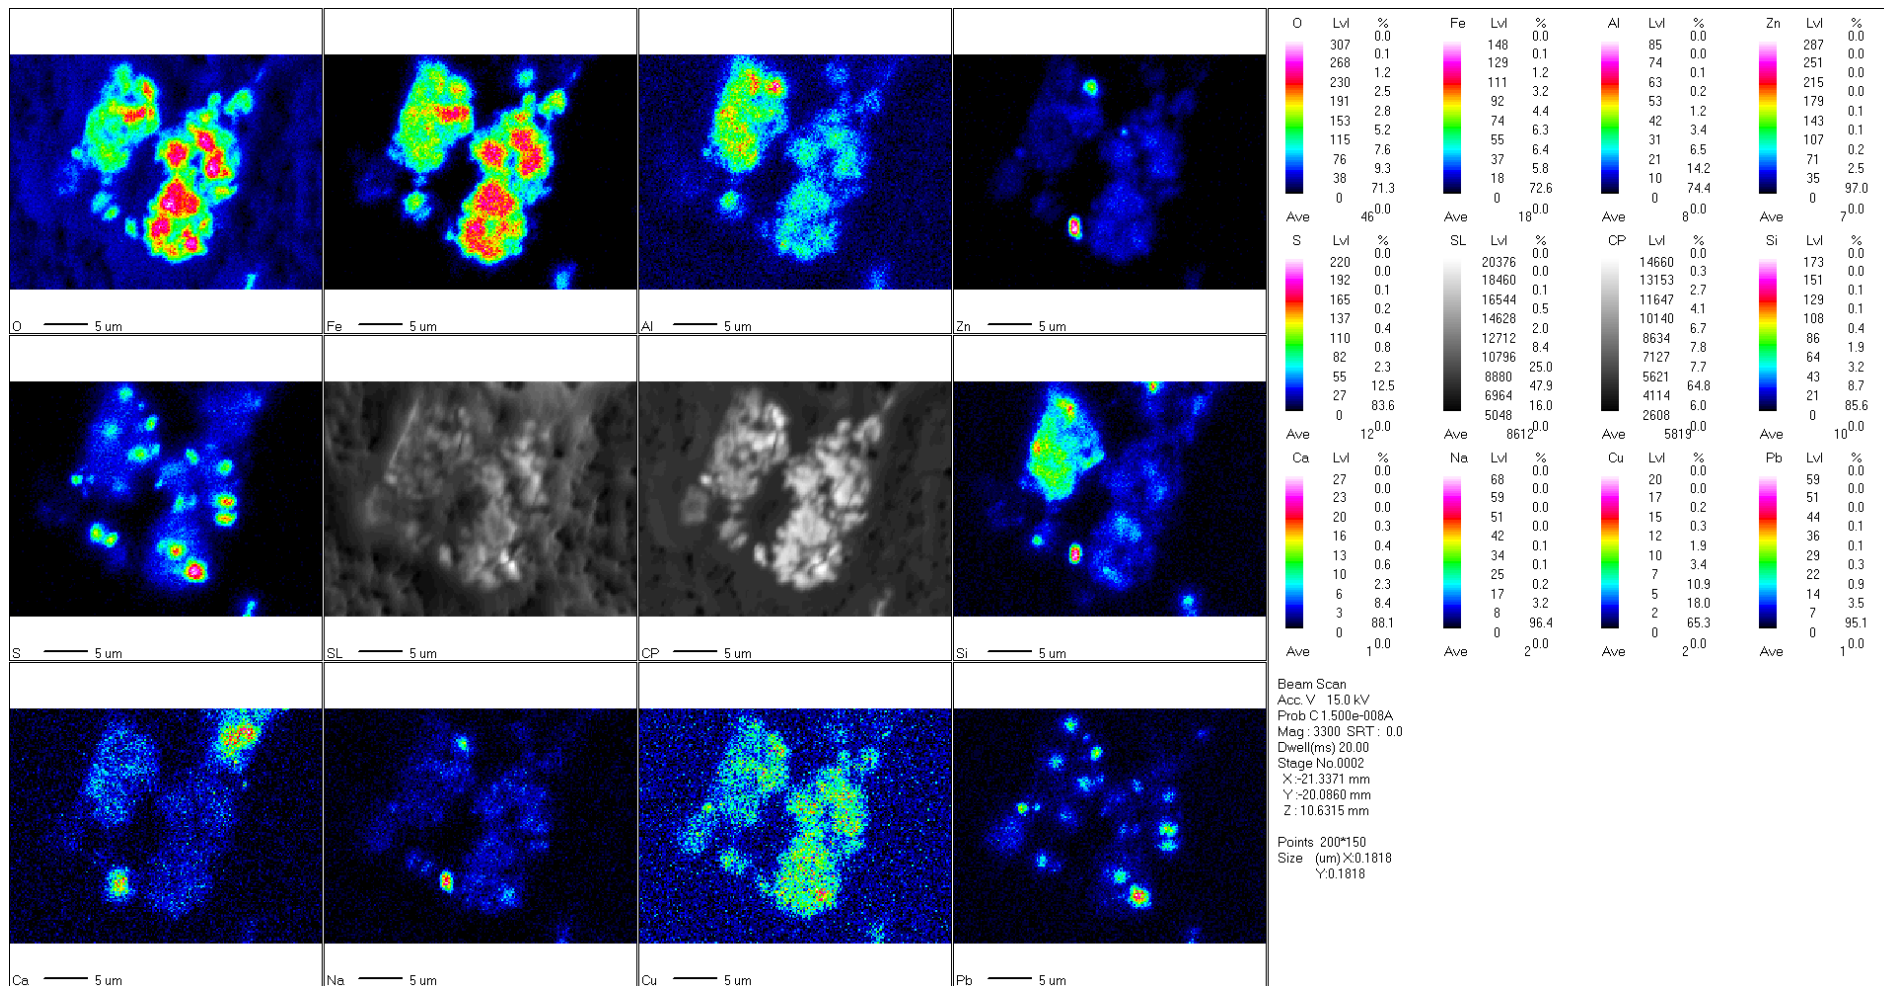

Figure S5: EPMA mapping of the goethite residue

## 2 Optimization of the leaching process

Table S1: Effect of the temperature on the composition of the pregnant leach solution using LevA-ChCl as lixiviant.<sup>a</sup>

| Temperature (°C) | Cu (ppm) | Fe (ppm) | Pb (ppm) | Zn (ppm) | $\alpha$ |
|------------------|----------|----------|----------|----------|----------|
| 30               | 4        | 506      | 107      | 2186     | 4.3      |
| 40               | 11       | 3235     | 293      | 3064     | 0.9      |
| 50               | 12       | 4233     | 274      | 3220     | 0.8      |
| 60               | 16       | 6362     | 347      | 3809     | 0.6      |

<sup>a</sup>Leaching conditions: L/S = 10, t = 24 h, H<sub>2</sub>O wt% = 30, 1000 rpm

Table S2: Effect of the L/S on the composition of the pregnant leach solution using LevA:ChCl(2:1) as liviviant.<sup>a</sup>

| L/S | Cu (ppm) | Fe (ppm) | Pb (ppm) | Zn (ppm) | $\alpha$ |
|-----|----------|----------|----------|----------|----------|
| 5   | 21       | 4253     | 473      | 5888     | 1.4      |
| 10  | 12       | 2799     | 270      | 3023     | 1.1      |
| 20  | 7        | 1297     | 151      | 1112     | 0.9      |
| 30  | 6        | 596      | 108      | 502      | 0.8      |
| 40  | 4        | 503      | 86       | 358      | 0.7      |

<sup>a</sup>Leaching conditions: T = 40 °C, t = 48 h, H<sub>2</sub>O wt% = 23, 1000 rpm

Table S3: Effect of the water content of the DES on the composition of the pregnant leach solution using LevA:ChCl(2:1) as lixiviant.<sup>a</sup> Leaching conditions: T = 40 °C, t = 48 h, L/S = 10, 1000rpm.

| H <sub>2</sub> O (wt%) | Cu (ppm) | Fe (ppm) | Pb (ppm) | Zn (ppm) | $\alpha$ |
|------------------------|----------|----------|----------|----------|----------|
| 1                      | 6        | 416      | 60       | 1531     | 3.7      |
| 9                      | 10       | 1157     | 183      | 2934     | 2.5      |
| 17                     | 11       | 2007     | 242      | 3031     | 1.5      |
| 23                     | 12       | 2799     | 270      | 3023     | 1.1      |

<sup>a</sup>Leaching conditions: T = 40 °C, t = 48 h, L/S = 10, 1000 rpm

Table S4: Effect of the leaching time on the composition of the pregnant leach solution using LevA:ChCl(2:1) as lixiviant.<sup>a</sup>

| <b>t (h)</b> | <b>Cu (ppm)</b> | <b>Fe (ppm)</b> | <b>Pb (ppm)</b> | <b>Zn (ppm)</b> | <b><math>\alpha</math></b> |
|--------------|-----------------|-----------------|-----------------|-----------------|----------------------------|
| 2            | 5               | 765             | 185             | 2839            | 3.7                        |
| 4            | 5               | 1063            | 189             | 2829            | 2.7                        |
| 6            | 7               | 1452            | 238             | 2981            | 2.1                        |
| 8            | 10              | 3017            | 292             | 2990            | 1.0                        |
| 24           | 11              | 3235            | 293             | 3064            | 0.9                        |
| 32           | 11              | 3520            | 305             | 3086            | 0.9                        |

<sup>a</sup>Leaching conditions: T = 40 °C, t = 24 h, H<sub>2</sub>O wt% = 30, 1000 rpm
